# Supplementary material for: Syntheses, structures and photoluminescence of a series of metal-organic complexes with 1,3,5-benzenetricarboxylate and pyrazino[2,3-f][1,10]-phenanthroline ligands
Source: Royal Society of Chemistry journal article supplement (doi:10.1039/b712015j), 2007-09-26
Supplement: b712015j.pdf [file b712015j.pdf]

# Supporting Information

**Syntheses, structures and photoluminescence of a series of metal-organic complexes with 1,3,5-benzenetricarboxylate and pyrazino[2,3-f][1,10]-phenanthroline ligands**

Guang-Bo Che,<sup>\*abc</sup> Chun-Bo Liu,<sup>abc</sup> Bo Liu,<sup>abc</sup> Qing-Wei Wang<sup>abc</sup> and Zhan-Lin Xu<sup>abc</sup>

*<sup>a</sup>Department of Chemistry, Jilin Normal University, Siping 136000, People's Republic of China*

*<sup>b</sup>Institute of Applied Chemistry, Jilin Normal University, Siping 136000, People's Republic of China*

*<sup>c</sup>College of Jilin Province, Engineering Research Center of Medicine Intermediate, Siping 136000, People's Republic of China*

<sup>\*,abc</sup> Correspondence author: Prof. Guang-Bo Che

E-mail: [guangbochejl@yahoo.com](mailto:guangbochejl@yahoo.com)

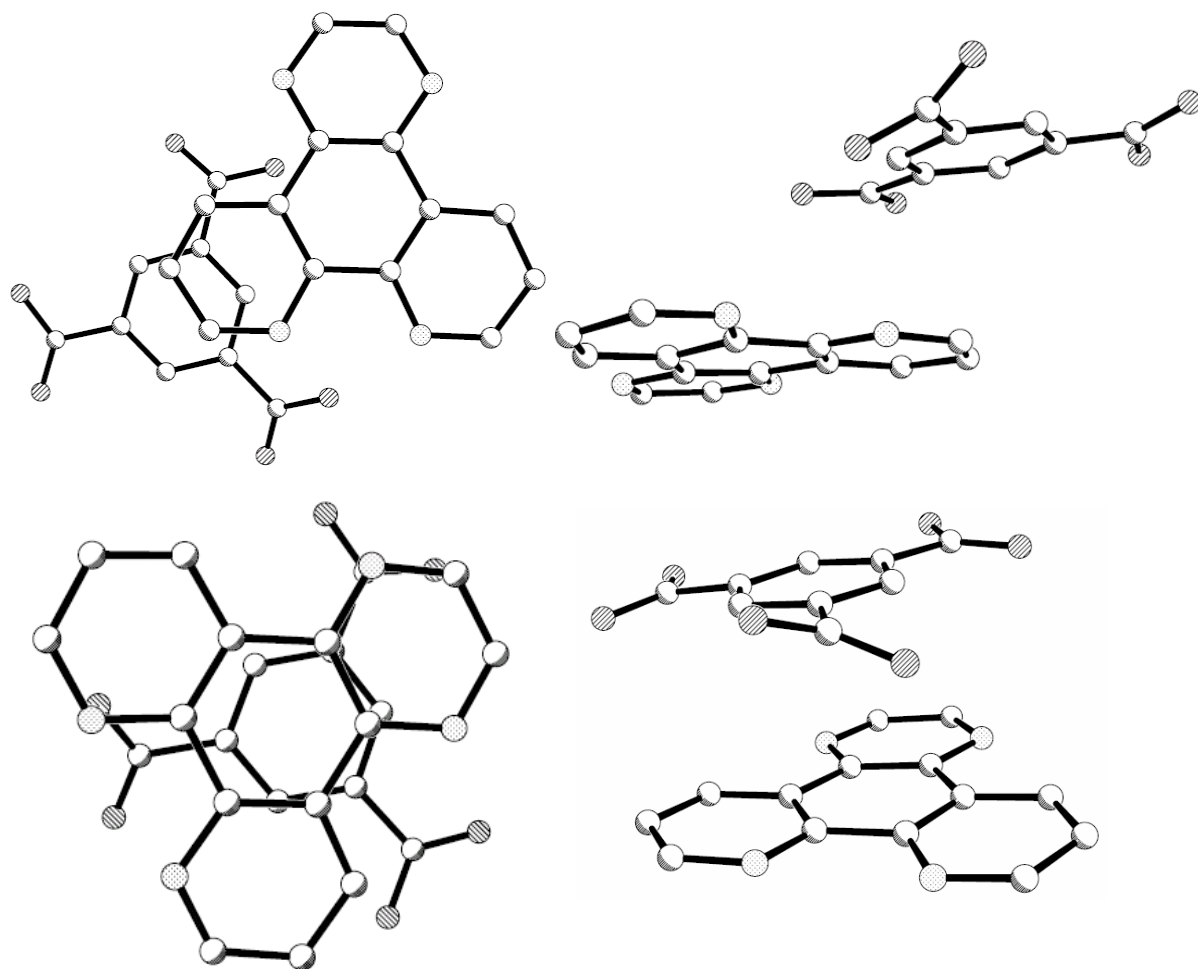

**Fig. S1.** The  $\pi$ - $\pi$  interactions of compound 1.

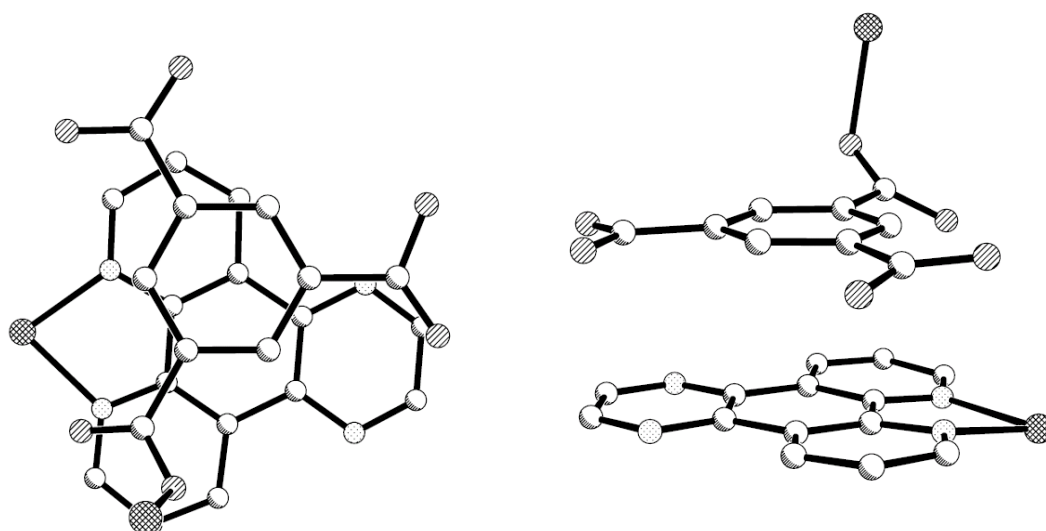

**Fig. S2.** The  $\pi$ - $\pi$  interactions of compound 2.

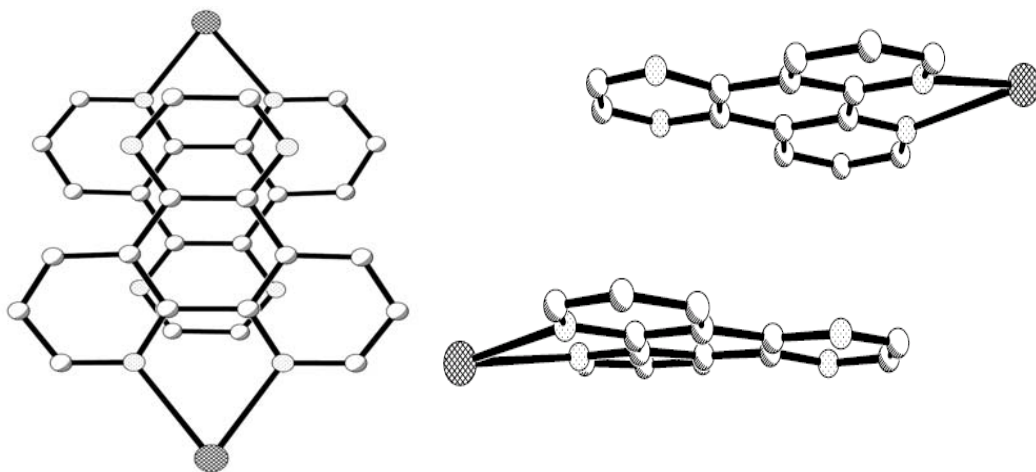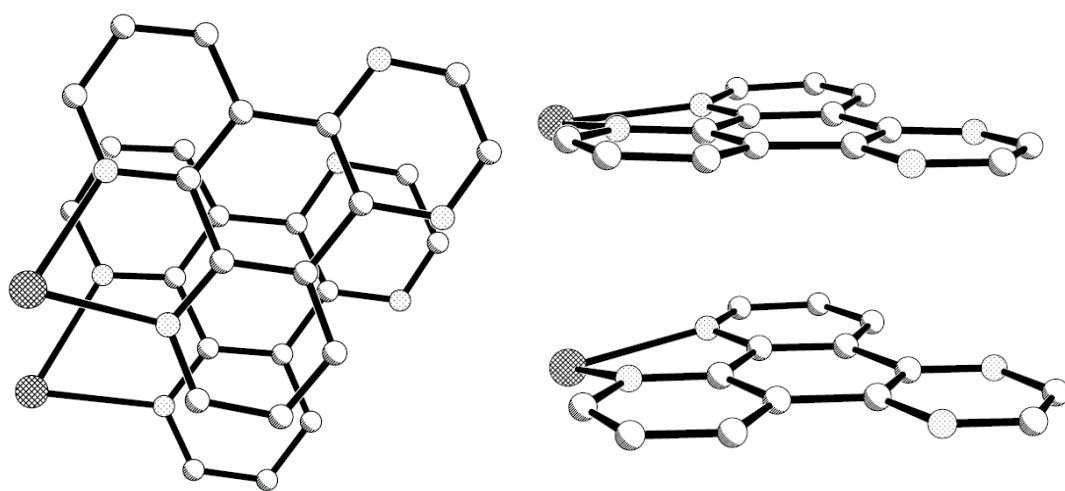

**Fig. S3.** The  $\pi$ - $\pi$  interactions of compound 3.

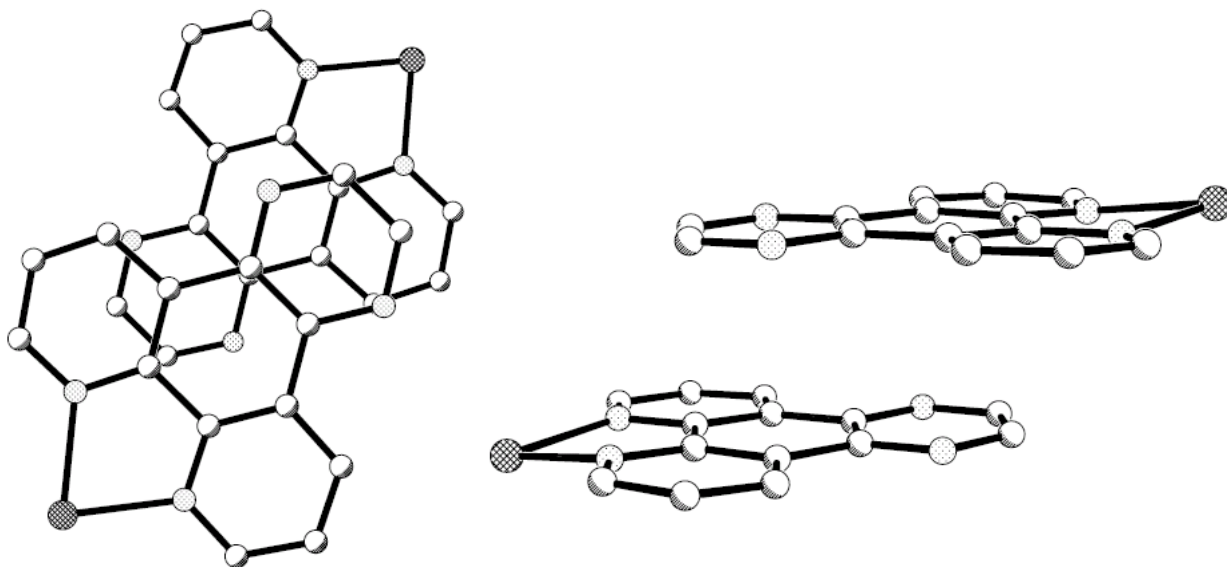

**Fig. S4.** The  $\pi$ - $\pi$  interactions of compound 4.
